# Supplementary material for: ACE2 and TMPRSS2 expression by clinical, HLA, immune, and microbial correlates across 34 human cancers and matched normal tissues: implications for SARS-CoV-2 COVID-19
Source: PubMed Central journal article supplement — J Immunother Cancer. 2020 Jul 15;8(2):e001020. doi: 10.1136/jitc-2020-001020 (PMC7372174; doi:10.1136/jitc-2020-001020), 2020-07-15
Supplement: jitc-2020-001020supp001.pdf [file jitc-2020-001020supp001.pdf]

## Supplementary Materials

for

### ***ACE2* and *TMPRSS2* expression by clinical, HLA, immune, and microbial correlates across 34 human cancers and matched normal tissues: implications for SARS-COV-2 COVID-19**

**Running Title:** Multi-dimensional correlates of *ACE2* and *TMPRSS2* expression

**Authors:** Riyue Bao<sup>1,2</sup>, Kyle Hernandez<sup>3,4</sup>, Lei Huang<sup>5</sup>, Jason J. Luke<sup>1,2,\*</sup>

<sup>1</sup>University of Pittsburgh Medical Center Hillman Cancer Center, Pittsburgh, PA

<sup>2</sup>Department of Medicine, University of Pittsburgh, Pittsburgh, PA

<sup>3</sup>Center for Translational Data Science, University of Chicago, Chicago, IL

<sup>4</sup>Department of Medicine, University of Chicago, Chicago, IL

<sup>5</sup>Center for Research Informatics, University of Chicago, Chicago, IL

**\*Corresponding Author:**

Jason J. Luke, MD, FACP

Associate Professor of Medicine

University of Pittsburgh Medical Center and Hillman Cancer Center

5150 Centre Ave. Room 564

Pittsburgh PA 15232

Telephone: (412) 647-2811

Fax: (412) 623-7948

[lukejj@upmc.edu](mailto:lukejj@upmc.edu)

This document contains **Supplementary Figures 1 and 2**. **Supplementary Tables 1 to 12** are provided separately as an Excel Spreadsheet file.

## Supplementary Figures

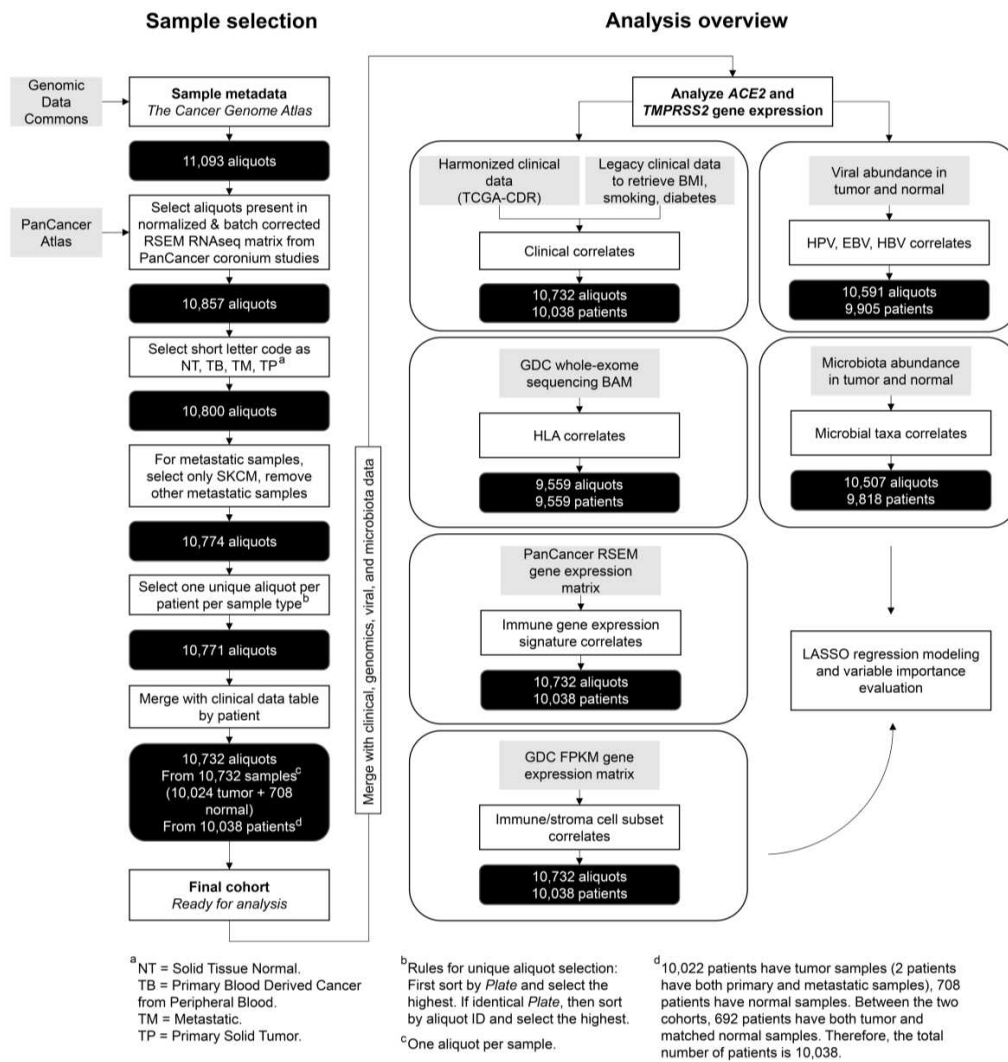

Supplementary Figure 1. Sample selection workflow.

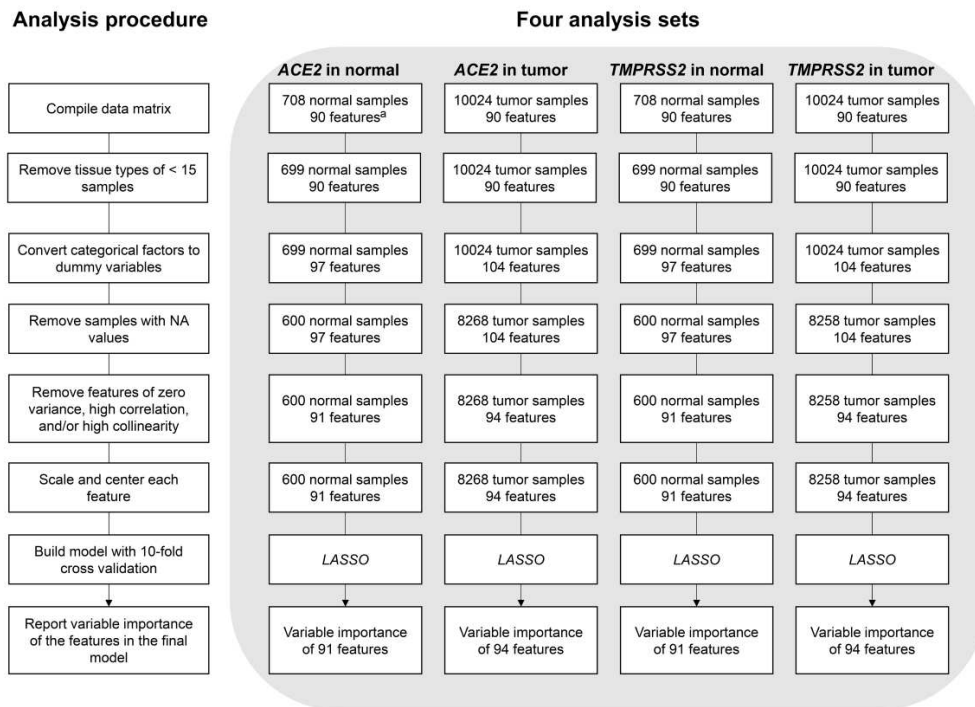

<sup>a</sup> 90 features consist of: tissue type, clinical (age, gender, race), immune expression signatures (ISG, T cell-inflamed, myeloid, angiogenesis, and TGF- $\beta$ ), immune cell subsets (macrophage M1, macrophage M2, CD8 T cells, CD4 T cells), non-immune cell subsets (epithelial cell), HPV status, and 75 microbiota taxa identified from microbiota correlation analysis.

**Supplementary Figure 2. Analytical workflow for variable importance evaluation using LASSO regression.**
